# High Urban Breeding Densities Do Not Disrupt Genetic Monogamy in a Bird Species

Sol Rodríguez-Martínez<sup>1,2\*</sup>, Martina Carrete<sup>2,3</sup>, Séverine Roques<sup>2</sup>, Natalia Rebolo-Ifrán<sup>4</sup>, José L. Tella<sup>2</sup>

**1** Department of Biology, Biochemistry and Pharmacy, Universidad Nacional del Sur, Bahía Blanca, Argentina, **2** Department of Conservation Biology, Estación Biológica de Doñana, CSIC, Sevilla, Spain, **3** Department of Physical, Chemical and Natural Systems, Universidad Pablo de Olavide, Sevilla, Spain, **4** Department of Ecology, Genetics and Evolution, IEGEBA-CONICET, Facultad de Ciencias Exactas y Naturales, Universidad de Buenos Aires, Buenos Aires, Argentina

## Abstract

Urbanization causes widespread endangerment of biodiversity worldwide. However, some species successfully colonize cities reaching higher densities than in their rural habitats. In these cases, although urban city dwellers may apparently be taking advantage of these new environments, they also face new ecological conditions that may induce behavioural changes. For example, the frequency of alternative reproductive behaviours such as extra-pair paternity and intraspecific brood parasitism might increase with breeding densities. Here, using a panel of 17 microsatellites, we tested whether increments in breeding densities such as those associated with urban invasion processes alter genetic monogamy in the burrowing owl *Athene cucularia*. Our results show low rates of extra-pair paternity (1.47%), but relatively high levels of intraspecific brood parasitism (8.82%). However, we were not able to detect differences in the frequency at which either alternative reproductive behaviour occurs along a strong breeding density gradient. Further research is needed to properly ascertain the role of other social and ecological factors in the frequency at which this species presents alternative reproductive strategies. Meanwhile, our results suggest that genetic monogamy is maintained despite the increment in conspecific density associated with a recent urban invasion process.

**Citation:** Rodríguez-Martínez S, Carrete M, Roques S, Rebolo-Ifrán N, Tella JL (2014) High Urban Breeding Densities Do Not Disrupt Genetic Monogamy in a Bird Species. PLoS ONE 9(3): e91314. doi:10.1371/journal.pone.0091314

**Editor:** Norman Johnson, University of Massachusetts, United States of America

**Received:** November 15, 2013; **Accepted:** February 9, 2014; **Published:** March 10, 2014

**Copyright:** © 2014 Rodríguez-Martínez et al. This is an open-access article distributed under the terms of the Creative Commons Attribution License, which permits unrestricted use, distribution, and reproduction in any medium, provided the original author and source are credited.

**Funding:** Funding was provided by Canal Sur TV, Fundación Repsol and Project CGL2012-31888 from MEC (Spain). N.R. and S.R.M. are supported by CONICET (Argentina) and M.C. by a Ramón y Cajal contract (RYC-2009-04860). The funders had no role in study design, data collection and analysis, decision to publish, or preparation of the manuscript.

**Competing Interests:** The authors have declared that no competing interests exist.

\* E-mail: solrodriguez@criba.edu.ar

## Introduction

Density affects direct interactions, both cooperative and competitive, by increasing spatial proximity among individuals. The spatial distribution of mates may, for example, influence the encounter rate between individuals, thus altering the frequency at which alternative reproductive behaviours such as extra-pair paternity or intraspecific brood parasitism appear [1]. Several studies have emphasized that many monogamous passerine birds, in which extra-pair paternity is relatively common [2], can show higher extra-pair copulation rates, and thus extra-pair paternity, as a consequence of increments in density [3]. However, extra-pair paternity is less common in non-passerine birds and its variability within and among species is still not fully understood [4]. Regarding intraspecific brood parasitism, there are examples of density-dependent changes in the frequency of this behaviour in a few bird species [5,6], although surprisingly it is a poorly explored reproductive behaviour overall [7].

Urbanization is considered as one of the most severe and lasting forms of land-use modification that occurs unchecked worldwide [8], intensifying the current biodiversity crisis [9,10]. However, the relationship between urbanization and biodiversity is multifaceted and complex, as species vary in their ability to respond to the drastic changes taking place along the urban-rural gradient [8,11]. Indeed, although most species decline and go extinct in urbanized landscapes [12], others are able to colonize and even increase their

densities in these human-modified areas [11,13]. In these cases, although urban city dwellers may apparently be taking advantage of these new environments, they may also face new ecological conditions that can induce behavioural changes [14–16]. For example, novel selection pressures associated with urban environments may alter the rates of alternative reproductive strategies in birds [17,18].

Here we investigate the frequency of alternative reproductive behaviours (extra-pair paternity and intraspecific brood parasitism) in the burrowing owl *Athene cucularia* along a breeding density gradient associated with a recent invasion of urban habitats [11]. The burrowing owl is a socially monogamous territorial species widely distributed throughout North and South America, where it shows marked differences in population trends. In the northern hemisphere, the transformation of grasslands and the use of contaminants seems to be leading to a negative population trend [19]. By contrast, in South America, it is a relatively common species in areas with different levels of grazing pressure [20] and, in recent years, in urban environments [11]. The abundance varies there between neighbouring urban and rural habitats in an Argentinean population, with higher densities in the former compared to the latter [11]. Thus, under the density hypothesis, we would expect a higher frequency of extra-pair paternity and/or intraspecific brood parasitism in territories located closer to others and in highly populated areas. Our genetic results, obtained after analysing a large microsatellite panel (17 out of 23 available

microsatellites), show that increments in breeding density are not promoting alternative reproductive tactics, at least in our study model. The low extra-pair paternity that we found is in accordance with other owl species breeding at lower densities, suggesting that density *per se* is not affecting the appearance of alternative reproductive strategies.

## Methods

### Ethics Statement

Capture, banding and blood sampling of burrowing owls were conducted under permits from the Argentinean wildlife agency (22500-4102/09), the Ethic Committee of CSIC (CEBA-EBD-11-28), and the owners of private properties.

### Study system and field procedures

The study area covers approximately 4,200 km<sup>2</sup> of natural grasslands, pastures, cereal crops and urban areas near the city of Bahía Blanca (38° 43' S 62° 16' W; Buenos Aires, Argentina; see [21,22]). There, we have carried out a survey program of breeding burrowing owls since 2006, accumulating 1,120 monitored nests as of 2012 (359 urban nests and 761 rural nests, most of them reoccupied between years). In our studied population, pairs are territorial and, although they can use burrows excavated by mammals for nesting, they mostly dig their own nests that are often reused from year to year. Therefore, the distribution of breeding burrowing owls is not constrained by the availability of potential nest sites, but rather by the differential susceptibility of individuals to human disturbance [21,22]. The depth of burrow nests precluded us from gathering information on clutch size, but brood size was easily recorded since chicks often exit the nest burrow entrance during the daytime. Average brood size was 2.77 nestlings per successful breeding attempt (SD = 1.24, n = 1,253), and both parents provided parental care (authors' unpublished data). The average adult life span is less than three years [21]. The lower predation pressure faced by individuals in urban habitats together with their lower natal dispersal distances compared with that of rural ones (0.26 km vs 0.42 km on average, respectively) seem to contribute to an increase in local breeding densities [21,22] and individual relatedness (Rodríguez-Martínez et al. in prep) in urban areas.

During the breeding seasons (late November to late February) of 2006–2012, we captured breeding individuals and chicks using bow nets and ribbon carpets placed at the entrance of active nests. Adult rural owls are more fearful of people than urban ones [21,22], making them difficult to capture and thus reducing the number of fully-sampled rural families (see Results). All birds were marked by using a plastic ring with an individual alphanumeric code readable at a distance, and released after recording body size variables and collecting blood samples (0.2 ml). Blood samples were preserved in absolute ethanol and kept at 4°C until their processing in the laboratory. Given the diurnal behaviour of the species [21,22], putative parents were easily identified by repeated observations (using telescopes) of the reproductive behaviour (e.g., nest attendance and defence, food provisioning) of individually marked birds across the breeding season, and were observed in their nests until the end of the reproductive period.

### Breeding densities

The diurnal activity of burrowing owls together with the flat landscape allowed us to easily locate breeding territories through the observation of pairs perched close to their burrows [21,22]. Some pairs occupy two or more closely-spaced burrows, and thus we GPS-marked (precision ±3 m) the active nest as an estimator

of the breeding territory core. We defined as urban territories those excavated by owls in private and public gardens and in spaces among houses in urbanized residential areas, but also on curbs of streets and even on large avenues in the city. Rural territories were located in the surrounding large expanses of natural grasslands and pastures devoted to wide-ranging livestock and low-intensive cereal crops, where human presence and activities are extremely low [11]. There is no clear habitat interface between urban and rural habitats, since urbanized areas are immediately surrounded by rural ones.

Because the distribution of breeding territories varied across years, estimators of conspecific densities around each active breeding territory were annually obtained using two complementary variables calculated using all breeding territories occupied each year. First, we measured the linear distance from the focal active nest to the nearest active nest (in metres). Second, we calculated an aggregation index for each active nest as its relative position within the whole distribution of the breeding population using  $\sum \exp(-d_{ij})$  (with  $i \neq j$ ), where  $d_{ij}$  was the linear distance between the active nests of breeding pairs  $i$  and  $j$ ,  $j$  representing all known breeding pairs [23]. These variables were complementarily depicting the social environment of each nest at a landscape scale as well as the proximity to the closest conspecific nest.

### Genetic characterization of individuals

Genomic DNA was isolated from blood samples following a modification of the silica-based method [24]. Birds were sexed using the polymerase chain reaction (PCR) amplification of the CHD-gene [25] according to the P0/P2/P8 sexing protocol [26]. A total of 23 polymorphic microsatellites previously developed for the burrowing owl [27–29] were tested, individually optimized, and used to genotype all sampled individuals (Table 1). All loci were PCR amplified in two independent multiplex reactions. For each PCR sample, 6.5 µl of QIAGEN Multiplex PCR master mix, 3 µl of RNase free water (provided with the QIAGEN Multiplex PCR master mix), 1.5 µl of the primers mix (5 µl of each in a final concentration of 2 µM) and 4 µl of template DNA were used. The reaction consisted of a 5 minute denaturation step at 95°C, 32 cycles of 30 seconds at 95°C, 90 seconds at 55°C and 30 seconds at 72°C, and a final extension step of 30 minutes at 60°C. PCR products were run on 1.5% agarose gels to check for amplification and yield, and then on an ABI3100 DNA analyzer to determine DNA sizes. Genotypes were assigned, both manually and automatically, using GeneMapper 3.7 (Applied Biosystems, Foster City, CA), and all electropherograms were double-checked independently by two people.

### Microsatellite variation

Deviations from Hardy-Weinberg equilibrium (HWE) and linkage disequilibrium (LD) between all pairs of loci were tested using Genepop'007 [30], applying Bonferroni's corrections for multiple tests. Probability of identity discrimination (PID) was estimated as described in Waits et al. [31] using Gimlet 1.3.3 [32]. Number of alleles, observed heterozygosity ( $H_o$ ), Nei's unbiased estimates of expected heterozygosity ( $H_e$ ), within population inbreeding coefficient ( $F$ ), exclusion probability (through polymorphic information content; PIC) and frequency of null alleles were estimated at each locus as well as across loci using CERNICALIN 1.30 [33], CERVUS 3.0 [34,35] and GENETIX 4.05.2 [36]. Standard exclusion probabilities for each locus and for the selected loci combined (Table 1) were estimated with CERVUS. Six of the 23 microsatellites explored were not at HW equilibrium (ATCU13, BUOW-BM4-A01, BUOW13, BUOW-BM4-A09, BUOW-BM4-B12, BUOW-RM2-D04), so they were excluded

**Table 1.** Characterization of 23 microsatellite loci used for paternity analysis in burrowing owls.

| Marker           | Sequence                                 | A  | N   | He   | Ho    | PIC    | HWE     |          |
|------------------|------------------------------------------|----|-----|------|-------|--------|---------|----------|
|                  |                                          |    |     |      |       |        | p-value | SE       |
| ATCU04 U         | AGCCATTCCCTTCAGTCTTC                     | 3  | 228 | 0.41 | 0.37  | 0.358  | 0.1026  | 0.0051   |
| ATCU04 L         | TTCATGGGTTTATGATCTGACTTC                 |    |     |      |       |        |         |          |
| ATCU06 U         | GCCATCCCTAATGCTTGTG                      | 20 | 229 | 0.90 | 0.87  | 0.885  | 0.02759 | 0.0075   |
| ATCU06 L         | GAAATGGAAGGAGGAGTGC                      |    |     |      |       |        |         |          |
| ATCU13 U         | GTTGTGAAGCGAGGGATG                       | 7  | 226 | 0.20 | 0.07  | 0.193  | <0.001  | 0.0000 * |
| ATCU13 L         | ACCCCGAGTCTCTAGTCAG                      |    |     |      |       |        |         |          |
| ATCU28 U         | TGGAGAGGTTTAGGGCTAGG                     | 15 | 223 | 0.82 | 0.81  | 0.802  | 0.2381  | 0.0321   |
| ATCU28 L         | CAGTGTGAGAGTCAAGACATGC                   |    |     |      |       |        |         |          |
| ATCU43 U         | GGGAGATGTTGAGGAAATCG                     | 11 | 229 | 0.82 | 0.82  | 0.794  | 0.0337  | 0.0071   |
| ATCU43 L         | GATCAGCTTGACAGCAAAGG                     |    |     |      |       |        |         |          |
| ATCU45 U         | GGGTGGACAGTTCCTCATT                      | 9  | 228 | 0.79 | 0.79  | 0.757  | 0.5714  | 0.0269   |
| ATCU45 L         | CTACCGAGCAGTGACAGTTTG                    |    |     |      |       |        |         |          |
| BUOW04 U         | AAGACAGAGTACGGGAAG                       | 9  | 229 | 0.78 | 0.83  | 0.748  | 0.9610  | 0.0098   |
| BUOW04 L         | TCCCCTGGGAGAACTCAC                       |    |     |      |       |        |         |          |
| BUOW06 U         | GGGCTTTGGATATCAGT                        | 4  | 229 | 0.17 | 0.096 | 0.161  | 0.0032  | 0.0010   |
| BUOW06 L         | CATGAGAAAAAAGCAAAC                       |    |     |      |       |        |         |          |
| BUOW11U          | GGCTATAATGGGTGAGTCA                      | 10 | 226 | 0.88 | 0.88  | 0.866  | 0.4653  | 0.015    |
| BUOW11L          | GGCACTCCCTGATTGTC                        |    |     |      |       |        |         |          |
| BUOW13 U         | TCTGACCTCGTTGCATC                        | 3  | 226 | 0.45 | 0.39  | 0.372  | <0.001  | 0.000 *  |
| BUOW13 L         | GGCCAGCTCAGTAACGTG                       |    |     |      |       |        |         |          |
| BUOW1U           | ACCACCACAGCCACACG                        | 6  | 227 | 0.62 | 0.61  | 0.564  | 0.1884  | 0.0135   |
| BUOW1L           | AAACCCCTAACATTGTCC                       |    |     |      |       |        |         |          |
| BUOW-BM4-A01 U   | GGAAACAGCTATGACCATAGGATCTCCCAACATTCTGGC  | 16 | 228 | 0.87 | 0.35  | 0.856  | <0.001  | 0.000 *  |
| BUOW-BM4-A01 L   | GTTTGAATCTGGACTAGATGACCTCC               |    |     |      |       |        |         |          |
| BUOW-BM4-A09 U   | CAGTCGGGCGTCATCAGCACTTAGGGACATGGTTTAGTGG | 10 | 213 | 0.70 | 0.38  | 0.661  | <0.001  | 0.0000 * |
| BUOW-BM4-A09 L   | GTTTCCTATGAAGACCCTCAAGCCC                |    |     |      |       |        |         |          |
| BUOW-BM4-B06 U   | GTTTCCTTATTACAAATTCACAGTG                | 13 | 228 | 0.77 | 0.81  | 0.7412 | 0.8658  | 0.0194   |
| BUOW-BM4-B06 L   | CAGTCGGGCGTCATCAGTTCACCTTTTATACATACTCCT  |    |     |      |       |        |         |          |
| BUOW-BM4-B12 U   | GTTTCTTATAGTTTGGACTGGGACG                | 14 | 228 | 0.83 | 0.75  | 0.808  | <0.001  | 0.0000 * |
| BUOW-BM4-B12 L   | CAGTCGGGCGTCATCATGCTAGCCGATTCCTCTACCC    |    |     |      |       |        |         |          |
| BUOW-BM4-C12 U   | CAGTCGGGCGTCATCATCTCTTCCAGGTGTCAGG       | 10 | 227 | 0.80 | 0.77  | 0.772  | 0.0509  | 0.0108   |
| BUOW-BM4-C12 L   | GTTAAGCGATTGGGAAGTGGTTGG                 |    |     |      |       |        |         |          |
| BUOW-BM4-D03 U   | GTTTCAGTGAGAGTGGGTTAACAGGC               | 3  | 227 | 0.44 | 0.48  | 0.346  | 0.9289  | 0.0095   |
| BUOW-BM4-D03 L   | CAGTCGGGCGTCATCAGGAAGATGGGTTTCAGGAACAG   |    |     |      |       |        |         |          |
| BUOW-BM4-E11 U   | CAGTCGGGCGTCATCATCTGCTCAGTAACACAAAGCTGG  | 8  | 227 | 0.78 | 0.75  | 0.745  | 0.2889  | 0.0166   |
| BUOW-BM4-E11 L   | GTTTATCTGGCTACAATGCTTCAGCG               |    |     |      |       |        |         |          |
| BUOW-BM4-H06 U   | CAGTCGGGCGTCATCATTAGGAGCAAACCAGGGAGGC    | 4  | 224 | 0.24 | 0.26  | 0.227  | 0.8984  | 0.0062   |
| BUOW-BM4-H06 L   | GTTTGCCAGTCCAGTGAGGTGTTACG               |    |     |      |       |        |         |          |
| BUOW-RM2-B12 U   | CAGTCGGGCGTCATCAGGCTCCCTCTACAGCAGGTC     | 6  | 227 | 0.36 | 0.38  | 0.343  | 0.7933  | 0.0171   |
| BUOW-RM2-B12 L   | GTTTGCTAAGCATTACCTCACATTGTCC             |    |     |      |       |        |         |          |
| BUOW-RM2-D04 U   | CAGTCGGGCGTCATCAGCTACCAGAAATTTGGGCATGGG  | 2  | 228 | 0.04 | 0.01  | 0.559  | <0.001  | 0.0000 * |
| BUOW-RM2-D04 L   | GTTTACATCTGGCATTATGTTTCCCTC              |    |     |      |       |        |         |          |
| BUOW-RM3-1-C04 U | GTTTGCACTGGTGCCAAACCTC                   | 3  | 227 | 0.51 | 0.54  | 0.445  | 0.7859  | 0.0092   |
| BUOW-RM3-1-C04 L | CAGTCGGGCGTCATCACTCAGCTAATGCATCCAGTTTC   |    |     |      |       |        |         |          |
| BUOW-RM3-1-H08 U | CAGTCGGGCGTCATCAGCAGAGGTTGTGCAGAGTTACG   | 8  | 228 | 0.51 | 0.53  | 0.483  | 0.8841  | 0.0128   |
| BUOW-RM3-1-H08 L | GTTTATAGAGAGCGCCAGTATGTCC                |    |     |      |       |        |         |          |

U upper primer, L lower primer, N number of individuals successfully genotyped at each locus, A number of alleles, He expected heterozygosity, HO observed heterozygosity, PIC polymorphic information content, \* HWE disequilibrium loci, after Bonferroni correction for multiple tests.  
doi:10.1371/journal.pone.0091314.t001

from parental analysis. Thus, our panel of microsatellites was reduced to 17, all of which were at linkage equilibrium (Table 1;  $p < 0.01$ ). PID for rural and urban birds were  $1.38E^{-15}$  and  $1.27E^{-15}$ , respectively.

### Parentage analysis

Parentage analyses were performed in CERVUS using a maximum likelihood method. Data considered corresponded to families in which both the putative mother and the putative father were sampled, as in other situations (i.e., just the putative mother or father were sampled) we were not able to resolve parent-offspring matching with a strong level of confidence given the high levels of endogamy that we found (see below). Due to the relatively small brood size of our study population (see above) and as we were not able to detect any replacement of breeding birds within a breeding season (0 cases in 333 well-monitored nests), we included in analyses all nests with at least one offspring sampled. Nonetheless, a single chick was sampled only in 30 out of the 68 broods ultimately used for parentage analysis (see results), and in 13 of these cases brood size was 1 or 2. A nestling was considered as potentially born from extra-pair copulations or as a result of intraspecific brood parasitism when the putative father and/or mother was not among the most likely sires given by the parental pair (sexes known) analyses of CERVUS. In all of those cases, we made a posterior confirmation of the putative father and/or mother through maternity and/or paternity analyses to check for genotypic mismatches that allowed us to confidently discard paternity/maternity. Mismatch distributions between putative parents and nestlings were checked. Genotypes were simulated for 10,000 offspring, with 100% of candidate parents sampled and a total proportion of loci typed over all individuals of 0.99, assuming an inbreeding rate of 0.06% (authors' unpublished data) and a genotyping error rate estimated by CERVUS of 0.01. 8% of assignments were at the relaxed level (80%) and 92% at the stricter one (95%) [34].

### Simulations

We used Monte Carlo simulations to evaluate the probability that the spatial patterns of extra-pair paternity and intraspecific brood parasitism could have occurred by chance, only constrained by the spatial distribution of breeding sites [37], or as a consequence of increments in intraspecific densities. Thus, we generated through 1,000 randomizations the expected distributions of nearest neighbour distances and aggregation indexes by shuffling the locations of the detected cases of extra-pair paternity, intraspecific brood parasitism, and both alternative reproductive strategies among all occupied breeding territories used for parentage analysis ( $n = 68$ ). 95% confidence intervals were obtained to compare them with the nearest neighbour distance and aggregation index of the territories where alternative reproductive strategies were actually observed.

### Results

During the breeding seasons of 2006–2012, we captured, bled and genotyped 1,107 individuals (674 chicks and 433 adults) at 565 active nests. From this total, we were able to use for analyses (see Methods) 121 chicks (plus their corresponding parents) belonging to 68 different nests (7 located in rural areas and 61 located in urban areas; Figure 1). These nests were representative of the large variability in the breeding density shown by the population, the nearest distances between active nests ranging from 0.01 to 15.07 km and the aggregation indexes ranging from 0 to 33 (Figure 2). Nests sampled for parentage analysis were slightly

skewed toward high density social environments (median nearest neighbour distance, for all nests: 0.23 km, quartiles = 0.12–0.46 km, for sampled nests: 0.16 km, quartiles = 0.08–0.30 km; Kolmogorov-Smirnov test:  $Z = 1.56$ ,  $p = 0.02$ ; median aggregation index, for all nests: 7.66, quartiles = 2.32–18.34, for sampled nests: 17, quartiles = 11.01–21.29;  $Z = 2.93$ ,  $p < 0.001$ ; Figure 2). This bias should however facilitate the detection of alternative reproductive strategies under the density hypothesis. Urban nests showed the densest breeding scenario while rural ones were located at lower densities (median nearest neighbour distances: urban nests: 0.16 km, quartiles = 0.1–0.28 km, rural nests: 0.30 km, quartiles = 0.16–1.49 km;  $Z = 5.45$ ,  $p < 0.001$ ; median aggregation: urban nests: 17, quartiles = 11.9–24.2, rural nests: 3.23, quartiles = 1.13–14.92;  $Z = 12.51$ ,  $p < 0.001$ ).

We detected extra-pair paternity in just one out of the 68 sampled broods (1.47%), with two chicks not genetically assigned to their putative father (mean = 3 mismatches,  $SD = 1.41$ ) in a territory located within the urban area. The resulting rate of extra-pair young was also low (1.65%,  $n = 121$ ). Additionally, we found 3–7 inconsistencies in the 17 sampled loci among 7 offspring genotypes and their putative mothers (mean = 5,  $SD = 1.91$ ), all of them belonging to 6 broods. Among these individuals, 5 were mismatched with their putative mothers and fathers (in 4 urban broods and 1 rural brood), while for the other 2 (in 1 urban brood) the mismatch occurred only with the putative mothers. The first cases may actually correspond to intraspecific brood parasitism, while the latter could be a consequence of quasi-parasitism (i.e., a female laying an egg in another female's nest, that egg being fertilised by the male partner at the parasitized nest). Thus, intraspecific brood parasitism could be occurring in our population in 7.35–8.82% of broods. Considering extra-pair paternity and conspecific brood parasitism together, these alternative reproductive strategies occurred at similar frequencies in rural and urban territories (14.28 and 9.83%, respectively; Yates  $\chi^2 = 0.14$ ,  $p = 0.714$ ).

For the first two years (2006–2007) we were able to sample only two complete families, so simulations to analyze the spatial distribution of alternative reproductive strategies were performed for the period 2009–2012. Simulations revealed that nests in which we observed alterations in the reproductive strategy of the species, i.e. extra-pair paternity and/or brood parasitism, were not located in more dense areas than those showing genetic monogamy (Figure 3). Indeed, these nests were at a median distance of 0.26 km to their nearest neighbours (quartiles = 0.16–0.32 km), while their median aggregation index reached 13.61 (quartiles = 6.54–17.97), both being within the 95% CI of the values expected by random chance (Figure 3). These results remain unchanged when considering extra-pair paternity and brood parasitism separately (Figure 3), supporting the idea that alterations in the reproductive strategy of the study species are not linked to increments in breeding densities.

### Discussion

Although most bird species were long considered monogamous [38], the widespread use of genetic markers in recent years has shown that a substantial proportion of these species are actually sexually promiscuous [39]. Indeed, alternative reproductive strategies are not rare and there is increasing evidence showing high rates of extra-pair copulations or, less commonly, intraspecific brood parasitism [40] in species considered as socially monogamous. Some authors suggest that these reproductive tactics are more frequent in particular ecological situations, such as at high breeding densities [4]. Published results are, however, conflicting,

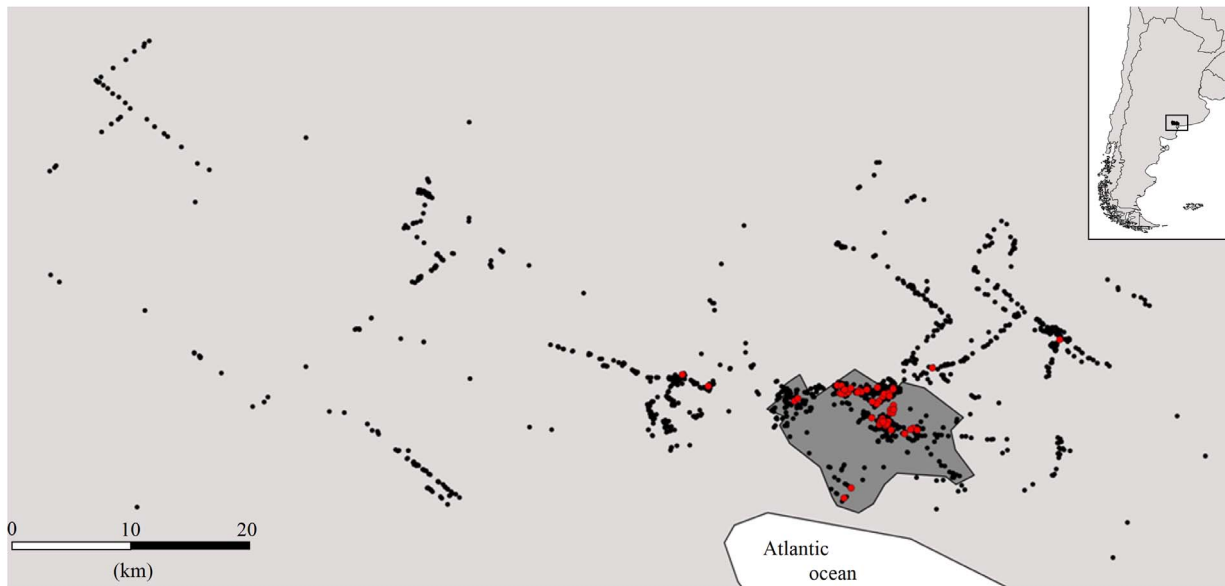

**Figure 1. Distribution of burrowing owl nests in the study area (light grey: rural area; dark grey: urban area).** Red dots show nests sampled for parentage analysis (2006: 1, 2007: 1, 2009: 15, 2010: 22, 2011: 21, 2012: 8), black dots show other active nests located during the whole study period. The aggregation of nests in the urban area is higher than observed in the figure given that many dots overlap within this area. doi:10.1371/journal.pone.0091314.g001

equally supporting (e.g., [41]) or refuting (e.g., [42]) the breeding density hypothesis. Here, using a large sample of broods covering a large breeding density gradient, we found that increments in density do not necessarily translate to a higher frequency in alternative breeding strategies.

The burrowing owl population studied mainly behaves as a genetically monogamous species with low extra-pair paternity rates. To our knowledge, there are no previous studies examining genetic parentage in burrowing owls. However, our results are similar to that reported for other owl species (Table 2). This low rate of extra-pair paternity among owls, and raptors in general [43–46], has been attributed to their low breeding densities, although other factors have also been discussed as possible causes underlying this pattern [47]. Here, we failed to find any

relationship between extra-pair paternity and density. Indeed, extra-pair paternity remains as low as expected in a low density situation, suggesting that other unexplored mechanisms such as breeding synchrony [2], mate guarding [48] or male age [49] could be acting to preclude this type of reproductive strategy.

Intraspecific brood parasitism was reported in 234 bird species, most of them precocial, but no case was detected among owls [50]. Thus, our finding regarding intraspecific brood parasitism that may reach rates (7.35–82%) comparable to those observed in colonial species such as European bee-eaters *Merops apiaster* (9–12%) [51], snow geese *Anser caerulescens* (5.7%) [5], common eiders *Somateria mollissima* (6%) [52], or monk parakeets *Myiopsitta monachus* (3%) [53] is intriguing. Brood parasitism is an alternative female reproductive behaviour that is poorly understood [7] and that can

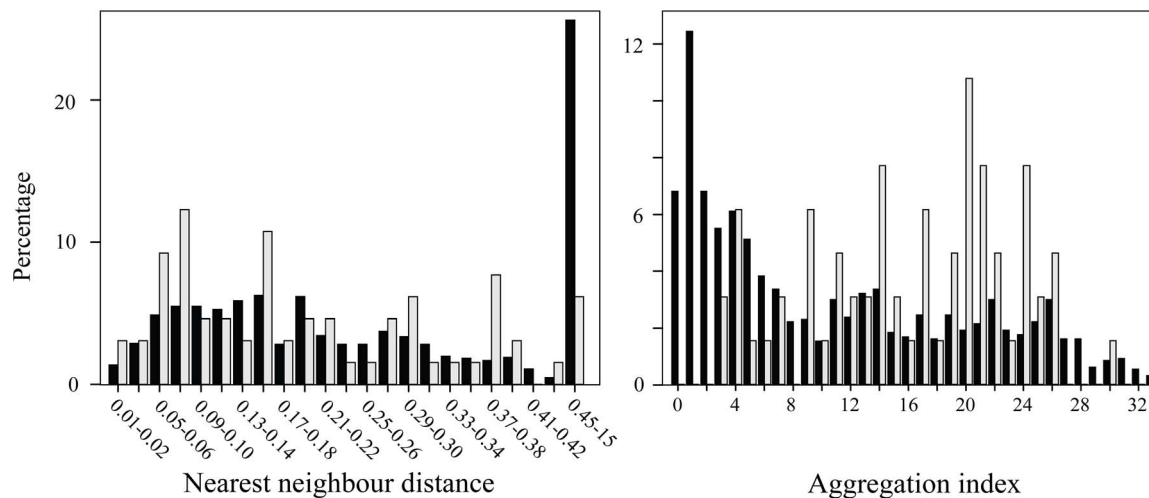

**Figure 2. Nearest neighbour distances (in km) and aggregation indexes obtained for all occupied (black bars) and sampled (grey bars) nests of burrowing owls.** Values were calculated separately for each year (see Methods). doi:10.1371/journal.pone.0091314.g002

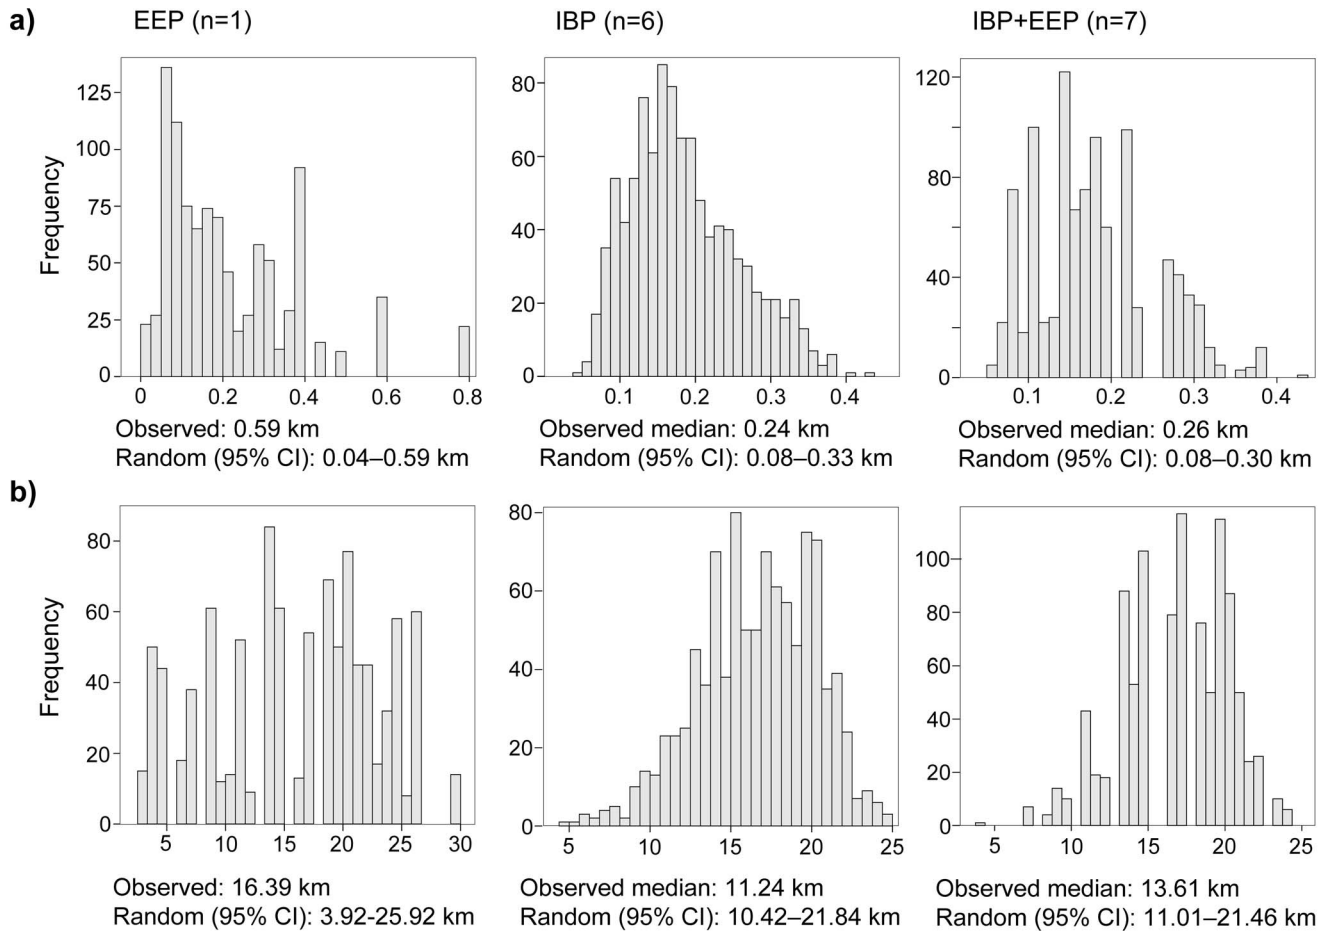

**Figure 3. Nearest neighbour distances (a) and aggregation indexes (b) expected after randomly shuffling the number of extra-pair paternities (EEP) and intraspecific brood parasitisms (IBP) observed in the monitored population of burrowing owls.** Plots are re-sampled frequency distributions. The median nearest neighbour distances and aggregation indexes of the nests where EEP and IBP were observed are provided, as well as their 95% CI expected by random chance.  
doi:10.1371/journal.pone.0091314.g003

be evolutionarily facilitated when natal philopatry is female-biased, such that hosts and parasites are close relatives [54]. Preliminary data on natal dispersal in our study population show that females disperse at larger distances than males (female: median = 0.46 km, quartiles = 0.16–2.03 km, n = 54; male: median = 0.15 km, quartiles = 0.04–0.47 km, n = 68; Z = 1.82, p = 0.003). However, as those distances are markedly short when compared with other owl species including Tengmalm’s owl *Aegolius funereus* (median = 30–56 km) [55], California spotted owl

*Strix occidentalis occidentalis* (mean = 10.9 km) [56] and eastern screech owls *Otus asio* (median = 2.3 km) [57], it may be that individuals have been weakly selected to develop behaviours aimed to avoid brood parasitism [7]. The hypothesis that intraspecific brood parasitism may be favoured when individuals are close relatives [54] may be more strongly supported by the high endogamy estimated in our population (authors’ unpublished data) and by observations gathered during the long-term monitoring of our individually marked population. Fledglings usually stayed with

**Table 2. Comparison of extra-pair paternity rates among owl species.**

| Species                                        | Extra-pair paternity (%) | No of nestlings | No of broods | Source     |
|------------------------------------------------|--------------------------|-----------------|--------------|------------|
| Little owl <i>Athene noctua</i>                | 0.00                     | 53              | 16           | [47]       |
| Flammulated owl <i>Otus flammeolus</i>         | 0.00                     | 37              | 17           | [68]       |
| Tawny owl <i>Strix aluco</i>                   | 0.70                     | 137             | 37           | [69]       |
| Barn owl <i>Tyto alba</i>                      | 0.80                     | 211             | 54           | [70]       |
| Burrowing owl <i>Athene cunicularia</i>        | 1.47                     | 121             | 68           | This study |
| Lanyu scops owl <i>Otus elegans botelensis</i> | 1.50                     | 200             | 108          | [71]       |

doi:10.1371/journal.pone.0091314.t002

parents until a few months before breeding (when they are less than one yr old), then often mated with close relatives and bred at short distances from their natal territories. Moreover, they were never observed to engage in aggressions with neighbours (authors' unpublished data). Nonetheless, further research, including larger sample sizes and sampling neighbouring nests and mates for assessing genetic relatedness, is needed for testing this hypothesis.

The frequency at which alternative reproductive strategies occur in a population could be highly affected by breeding densities [58]. However, as our genetic results and spatial simulations suggest, changes in some of these factors alone are not enough to promote such strategies. Studies supporting the breeding density hypothesis were mostly done on songbirds (Passeriformes) [4], an order of birds in which frequencies of extra-pair paternity are relatively high [2]. However, even within this order there is no strong evidence for a general relationship between population density and extra-pair paternity across species ([59] but see [4,60]). In this sense, our study also fails to support the density hypothesis, suggesting that the aggregation of individuals at particular sites does not necessarily promote alterations in the reproductive behaviour of individuals.

Urbanization modifies landscape structures drastically, forcing species to adapt or disappear [13]. For those species that become

urban dwellers, changes in top-down or bottom-up factors that affect rates of nest predation or alter local resources [61–63] can prompt a variety of population level responses, including increments in densities compared with their natural counterparts [64–67]. Although more research is needed to properly understand the overall costs and benefits of urban invasion, our study provides strong evidence against increases in the frequency of alternative reproductive strategies despite large increases in conspecific densities in a recent urban invader [11].

## Acknowledgments

We thank N. Lois, N. Tella-Carrete, M. Santillán, S. Briones, P. Laiolo, M. de la Riva, M. Vázquez, and S. Cabezas for their help in locating nests and capturing owls over the years, and D. Canal for his help in data analyses. Field work was conducted under permits from Argentinean wildlife agencies and the owners of private properties.

## Author Contributions

Conceived and designed the experiments: SRM MC JLT. Performed the experiments: SRM MC SR NRI JLT. Analyzed the data: SRM MC SR. Contributed reagents/materials/analysis tools: SRM MC NRI SR JLT. Wrote the paper: SRM MC NRI SR JLT.

## References

1. Thusius KJ, Dunn PO, Peterson KA, Whittingham LA (2001) Extrapair paternity is influenced by breeding synchrony and density in the common yellowthroat. *Behav Ecol* 12: 633–639.
2. Stutchbury BJ, Morton ES (1995) The effect of breeding synchrony on extra-pair mating systems in songbird. *Behaviour* 132: 675–690.
3. Mayer C, Pasinelli G (2013) New support for an old hypothesis: density affects extra-pair paternity. *Ecol Evol* 3: 694–705.
4. Westneat DF, Sherman PW (1997) Density and extra-pair fertilizations in birds: a comparative analysis. *Behav Ecol Sociobiol* 41: 205–215.
5. Lank DB, Rockwell RF, Cooke F (1990) Frequency-dependent fitness consequences of intraspecific nest parasitism in snow geese. *Evolution* 44: 1436–1453.
6. Petric M, Moller AP (1991) Laying eggs in others' nests: Intraspecific brood parasitism in birds. *Trends Ecol Evol* 6: 315–320.
7. Lyon BE, Eadie JM (2008) Conspecific brood parasitism in birds: A life-history perspective. *Annu Rev Ecol Syst* 39: 343–363.
8. McKinney ML (2002) Urbanization, biodiversity and conservation. *Bioscience* 52: 883–890.
9. McDonald RI, Kareiva P, Forman RTT (2008) The implications of current and future urbanization for global protected areas and biodiversity conservation. *Biol Conserv* 141: 1695–1703.
10. Butchart SHM, Walpole M, Collen B, van Strien A, Scharlemann JPW, et al. (2010) Global biodiversity: indicators of recent declines. *Science* 328: 1164–1168.
11. Carrete M, Tella JL (2011) Inter-individual variability in fear of humans and relative brain size of the species are related to contemporary urban invasion in birds. *PLoS ONE* 6: e18859.
12. Grimm NB, Faeth SH, Golubiewski NE, Redman CL, Wu J, et al. (2008) Global change and the ecology of cities. *Science* 319: 756–760.
13. Møller AP (2009) Successful city dwellers: a comparative study of the ecological characteristics of urban birds in the Western Palearctic. *Oecologia* 159: 849–858.
14. Sih A, Ferrari MCO, Harris DJ (2011) Evolution and behavioural responses to human-induced rapid environmental change. *Evol Appl* 4: 367–387.
15. Tuomainen U, Candolin U (2010) Behavioural responses to human-induced environmental change. *Biol Rev* 86: 640–657.
16. Rodewald AD, Shustack DP, Jones TM (2011) Dynamic selective environments and evolutionary traps in human-dominated landscapes. *Ecology* 92: 1781–1788.
17. Ryder TB, Fleischer RC, Shriver WG, Marra PP (2012) The ecological-evolutionary interplay: density-dependent sexual selection in a migratory songbird. *Ecol Evol* 2: 976–987.
18. Moore JA, Kamarainen AM, Scribner KT, Mykut C, Prince HH (2012) The effects of anthropogenic alteration of nesting habitat on rates of extra-pair fertilization and intraspecific brood parasitism in Canada Geese *Branta canadensis*. *Ibis* 154: 354–362.
19. Clayton KM, Schmutz JK (1999) Is the decline of burrowing owls *Speotyto cucularia* in prairie Canada linked to changes in Great Plains ecosystems? *Bird Conserv Int* 9: 163–185.
20. Machicote M, Branch LC, Villarreal D (2004) Burrowing owls and burrowing mammals: are ecosystem engineers interchangeable as facilitators? *Oikos* 106: 527–535.
21. Carrete M, Tella JL (2013) High individual consistency in fear of humans throughout the adult lifespan or rural and urban burrowing owls. *Sci Rep* 3:3524.
22. Carrete M, Tella JL (2010) Individual consistency in flight initiation distances in burrowing owls: a new hypothesis on disturbance-induced habitat selection. *Biol Lett* 6: 167–170.
23. Cardador L, Carrete M, Mañosa S (2012) Inter-individual variability and conspecific densities: consequences for population regulation and range expansion. *PLoS ONE* 7: e33375.
24. Ivanova N V., Dewaard JR, Hebert PDN (2006) An inexpensive, automation-friendly protocol for recovering high-quality DNA. *Mol Ecol Notes* 6: 998–1002.
25. Kahn NW, John JST, Quinn TW (1998) Chromosome-specific intron size differences in the avian CHD gene provide an efficient method for sex identification in birds. *Auk* 115: 1074–1078.
26. Han AJ, Kim J, Kim S, Park S, Na K (2009) A simple and improved DNA test for avian sex determination. *Auk* 126: 779–783.
27. Korfanta NM, Schable NA, Glenn TC (2002) Isolation and characterization of microsatellite DNA primers in burrowing owl (*Athene cucularia*). *Mol Ecol* 2: 584–585.
28. Faircloth BC, Title A, Tan K, Welty J, Belthoff JR, et al. (2010) Eighteen microsatellite loci developed from western burrowing owls (*Athene cucularia hypugaea*). *Conserv Genet Resour* 2: 167–171.
29. Macias-Duarte A, Conway CJ, Munguia-Vega A, Culver M (2010) Novel microsatellite loci for the burrowing owl *Athene cucularia*. *Conserv Genet Resour* 2: 67–69.
30. Rousset F (2008) Genepop'007: a complete re-implementation of the genepop software for Windows and Linux. *Mol Ecol Resour* 8: 103–106.
31. Waits LP, Luikart G, Taberlet P (2001) Estimating the probability of identity among genotypes in natural populations: cautions and guidelines. *Mol Ecol* 10: 249–256.
32. Valière N (2002) GIMLET: a computer program for analysing genetic individual identification data. *Mol Ecol Notes* 2: 377–379.
33. Aparicio JM, Ortego J, Cordero PJ (2006) What should we weigh to estimate heterozygosity, alleles or loci? *Mol Ecol* 15: 4659–4665.
34. Marshall TC, Slate J, Kruuk LEB, Pemberton J (1998) Statistical confidence for likelihood-based paternity. *Mol Ecol* 7: 639–655.
35. Kalinowski ST, Taper ML, Marshall TC (2007) Revising how the computer program CERVUS accommodates genotyping error increases success in paternity assignment. *Mol Ecol* 16: 1099–1106.
36. Belkhir K, Borsa P, Chikhi L, Raufaste N, Bonhomme F (1996–2002) GENETIX 4.04 Logiciel sous Windows TM, pour la Génétique des Populations. Laboratoire Génome, Populations, Interactions, CNRS UMR 5000, Université de Montpellier II, Montpellier, France.
37. Serrano D, Carrete M, Tella JL (2008) Describing dispersal under habitat constraints: a randomization approach in lesser kestrels. *Basic Appl Ecol* 9: 771–778.
38. Lack D (1968) Ecological adaptations for breeding in birds. London: Methuen.



39. Griffith SC (2000) High fidelity on islands: a comparative study of extrapair paternity in passerine birds. *Behav Ecol* 11: 265–273.
40. Birkhead T, Møller AP (1992) Sperm competition in birds: evolutionary causes and consequences. London: Academic Press.
41. Richardson DS, Burke T (2001) Extrapair paternity and variance in reproductive success related to breeding density in Bullock's orioles. *Anim Behav* 62: 519–525.
42. Mulder RA, Dunn PO, Cockburn A, Lazenby-Cohen KA, Howell MJ (1994) Helpers liberate female fairy-wrens from constraints on extra-pair mate choice. *Proc R Soc Lond B* 255: 223–229.
43. Korpimäki E, Lahti K, May CA, Parkin DT, Powell GB, et al. (1996) Copulatory behaviour and paternity determined by DNA fingerprinting in kestrels: effects of cyclic food abundance. *Anim Behav* 51: 945–955.
44. Negro JJ, Villarroel M, Tella JL, Kuhnlein U, Hiraldo F, et al. (1996) DNA fingerprinting reveals a low incidence of extra-pair fertilizations in the lesser kestrel. *Anim Behav* 51: 935–943.
45. Lawless SG, Ritchison G, Klatt PH, Westneat DF (1997) The mating strategies of eastern screech-owls: a genetic analysis. *Condor* 99: 213–217.
46. Marks JS, Dickinson JL, Haydock J (1999) Genetic monogamy in long-eared owls. *Condor* 101: 854–859.
47. Müller W, Epplen JT, Lubjuhn T (2001) Genetic paternity analyses in little owls (*Athene noctua*): does the high rate of paternal care select against extra-pair young? *J Ornithol* 142: 195–203.
48. Gowaty PA, Plissner JH, Williams TG (1989) Behavioural correlates of uncertain parentage: mate guarding and nest guarding by eastern bluebirds, *Sialia sialis*. *Anim Behav* 38: 272–284.
49. Westneat DF, Stewart IRK (2003) Extra-pair paternity in birds: causes, correlates, and conflict. *Annu Rev Ecol Evol Syst* 34: 365–396.
50. Yom-Tov Y (2001) An updated list and some comments on the occurrence of intraspecific nest parasitism in birds. *Ibis* 143: 133–143.
51. Wrege PH, Emlen ST (1987) Biochemical determination of parental uncertainty in white-fronted bee-eaters. *Behav Ecol Sociobiol* 20: 153–160.
52. Waldeck P, Kilpi M, Öst M, Andersson M (2004) Brood parasitism in a population of common eider (*Somateria mollissima*). *Behaviour* 141: 725–739.
53. Martínez JJ, de Aranzamendi MC, Masello JF, Bucher EH (2013) Genetic evidence of extra-pair paternity and intraspecific brood parasitism in the monk parakeet. *Front Zool* 10: 68.
54. Andersson M (2001) Relatedness and the evolution of conspecific brood parasitism. *Am Nat* 158: 599–614.
55. Korpimäki E, Lagerstrom M (1988) Survival and natal dispersal of fledglings of Tengmalm's owl in relation to fluctuating food conditions and hatching date. *J Anim Ecol* 57: 433–441.
56. Lahaye WS, Gutiérrez RJ, Dunk JR (2001) Natal dispersal of the spotted owl in Southern California: Dispersal profile of an insular population. *Condor* 103: 691–700.
57. Belthoff JR, Ritchison G (1989) Natal dispersal of eastern screech owls. *Condor* 91: 254–265.
58. Westneat DF, Sherman PW, Morton ML (1990) The ecology and evolution of extra-pair copulations in birds. *Curr Ornithol* 7: 331–369.
59. Griffith SC, Owens IP, Thuman K (2002) Extra pair paternity in birds: a review of interspecific variation and adaptive function. *Mol Ecol* 11: 2195–2212.
60. Møller AP, Ninni P (1998) Sperm competition and sexual selection: a meta-analysis of paternity studies of birds. *Behav Ecol Sociobiol* 43: 345–358.
61. Bolger DT (2001) Urban birds: population, community, and landscape approaches. In: Marzluff JM, Bowman R, Donnelly R, editors. *Avian Ecology and Conservation in an Urbanizing World*. Boston, MA: Springer US. pp. 155–177.
62. Faeth SH, Warren PS, Shochat E, Marussich WA (2005) Trophic dynamics in urban communities. *Bioscience* 55: 399–407.
63. Rodewald AD, Shustack DP (2008) Urban flight: understanding individual and population-level responses of Nearctic-Neotropical migratory birds to urbanization. *J Anim Ecol* 77: 83–91.
64. Marzluff JM, Bowman R, Donnelly R (2001) *Avian ecology and conservation. A historical perspective on urban bird research: trends, terms, and approaches*. Kluwer Academic Publishers, Norwell, MA. pp. 1–17.
65. Chace JF, Walsh JJ (2006) Urban effects on native avifauna: a review. *Lands Urban Plan* 74: 46–69.
66. Rodewald AD, Kearns IJ, Shustack DP (2011) Anthropogenic resource subsidies decouple predator-prey relationships. *Ecol Appl* 21: 936–943.
67. Rodewald AD, Shustack DP (2008) Consumer resource matching in urbanizing landscapes: are synanthropic species over-matching? *Ecology* 89: 515–521.
68. Arsenault DP, Stacey PB, Hoelzer GA (2002) No extra-pair fertilization in flammulated owls despite aggregated nesting. *Condor* 104: 197–201.
69. Saladin V, Ritschard M, Roulin A, Bize P, Richner H (2007) Analysis of genetic parentage in the tawny owl (*Strix aluco*) reveals extra-pair paternity is low. *J Ornithol* 148: 113–116.
70. Roulin A, Müller W, Sasvári L, Dijkstra C, Ducrest A-L, et al. (2004) Extra-pair paternity, testes size and testosterone level in relation to colour polymorphism in the barn owl *Tyto alba*. *J Avian Biol* 35: 492–500.
71. Hsu Y-C, Li S-H, Lin Y-S, Philippart MT, Severinghaus LL (2006) High frequency of extra-pair copulation with low level of extra-pair fertilization in the Lanyu scops owl *Otus elegans botelensis*. *J Avian Biol* 37: 36–40.
